# Supplementary material for: The canonical α-SNAP is essential for gametophytic development in Arabidopsis
Source: PLOS journal article supplement (doi:10.1371/journal.pgen.1009505), 2021-04-22
Supplement: S8 (10.1371/journal.pgen.1009505.s008) [file journal.pgen.1009505.s008]

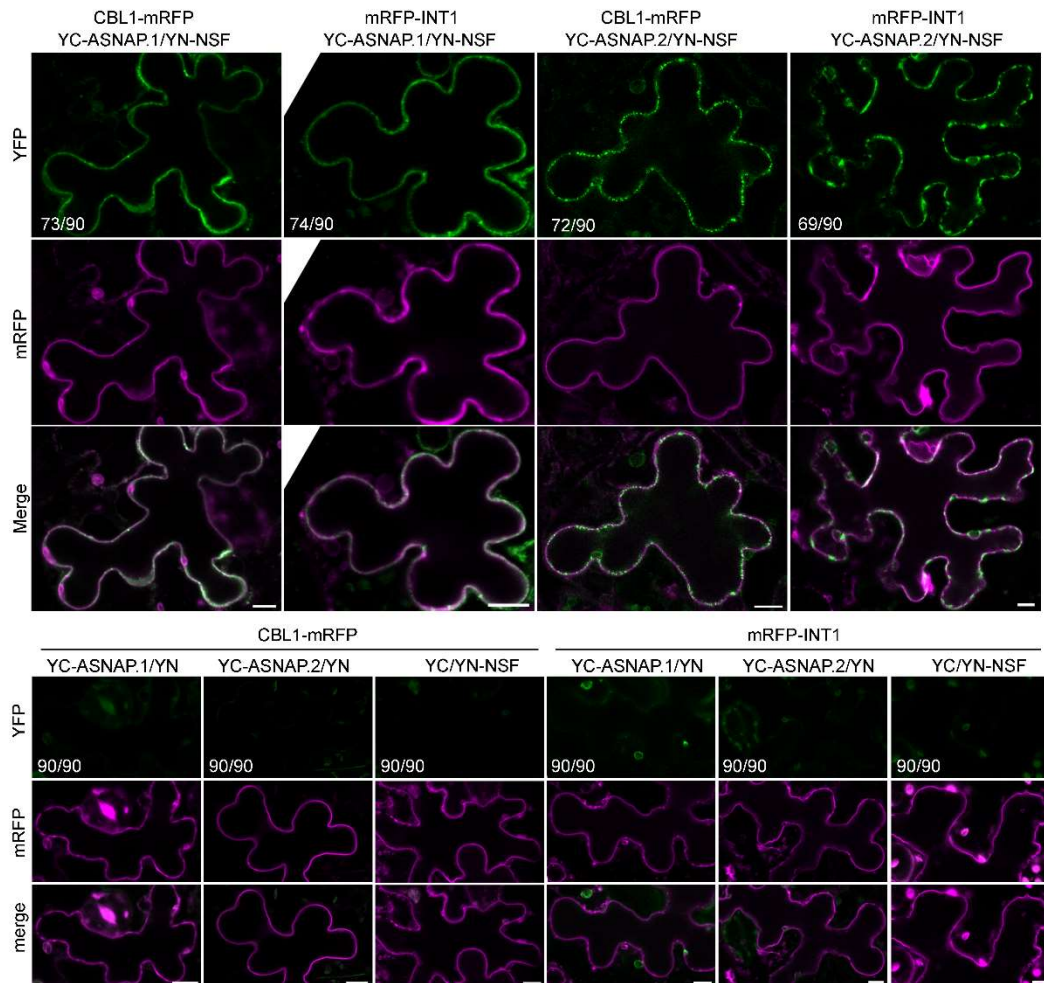

### S8 Fig. Both ASNA isoforms interact with NSF.

Representative CLSM of tobacco leaf epidermal cells expressing corresponding proteins in bimolecular fluorescence complementation (BiFC) assays. For BiFC assays, agrobacterium transformed with 35S:CBL1-mRFP (as a marker for the PM) or with 35S:mRFP-INT1 (as a marker for the tonoplast) is co-infiltrated with agrobacterium transformed with YN- and YC-vectors in a 1:1 ratio and 90 RFP-positive cells for every BiFC combination from three replicates were examined for YFP signals. Numbers at the bottom indicate displayed/transformed epidermal cells. Bars = 10  $\mu$ m.

Supports Figure 9.
